# Supplementary material
Source: PubMed Central journal article supplement (PMC2781639)
Supplement: supp_M109.004796_jbc.M109.004796-1.pdf [file supp_M109.004796_jbc.M109.004796-1.pdf]

**PTEN DIRECTS PROSTAGLANDIN E<sub>2</sub>-MEDIATED FIBROBLAST RESPONSES VIA  
REGULATION OF E PROSTANOID 2 RECEPTOR EXPRESSION**

**Rommel L. Sagana<sup>\*</sup>, Mei Yan<sup>\*</sup>, Ashley M. Cornett<sup>\*</sup>, Jessica L. Tsui<sup>\*</sup>, David A. Stephenson<sup>\*</sup>, Steven  
K. Huang<sup>\*</sup>, Bethany B. Moore<sup>\*,‡</sup>, Megan N. Ballinger<sup>\*</sup>, Janet Melanacos<sup>‡</sup>, Christopher D. Kontos<sup>‡</sup>,  
David M. Aronoff<sup>\*,‡</sup>, Marc Peters-Golden<sup>\*,‡</sup>, and Eric S. White<sup>\*,‡,§</sup>**

<sup>\*</sup>Division of Pulmonary and Critical Care Medicine and <sup>†</sup>Division of Infectious Diseases,  
Department of Internal Medicine, University of Michigan Medical School, <sup>‡</sup>Division of  
Cardiology, Department of Medicine, Duke University Medical School, and <sup>§</sup>Graduate Programs  
in Immunology and <sup>§</sup>Cellular & Molecular Biology

University of Michigan Medical School, Ann Arbor, MI USA 48109

Running head: PTEN regulates EP2 expression

Address correspondence to: Eric S. White, MD, Division of Pulmonary and Critical Care  
Medicine, University of Michigan Medical School, 6301 MSRB III SPC5642, 1150 W. Medical  
Center Drive, Ann Arbor, MI 48109, USA, Phone: (734) 936-7934, Fax: (734) 764-2655, Email:  
[docew@umich.edu](mailto:docew@umich.edu)

**SUPPLEMENTAL DATA**

## Table Legend

**Table S1.** Primer and Probe sequences for quantitative real-time PCR.

## Figure Legends

**Figure S1.** Short hairpin RNA interference of PTEN by stable retroviral transfection in IMR-90 cells. Cells were infected with retrovirus encoding PTEN shRNA and stable transfectants were selected with puromycin. Compared to uninfected cells, a representative blot of shRNA-transfected cells demonstrated complete knockdown of PTEN with a corresponding increase in Akt activity (pAkt).

**Figure S2.** PGE<sub>2</sub> inhibits TGF- $\beta$ -induced  $\alpha$ -SMA in normal murine embryonic fibroblasts. Results are representative of 3 separate experiments. The graph shows the densitometric analysis of protein expression. Data are pooled from 3 separate blots.

**Figure S3.** Quantitative PCR of embryonic C57Bl/6 WT murine fibroblasts for  $\alpha$ -SMA and collagen I. \*P<0.0001 compared to the control condition. \*\*P=0.0005 compared to the control condition. Results are representative of 3 separate experiments. Data are expressed as percent change in gene expression ( $\pm$ SD) compared to the serum-free condition.

**Figure S4.** PTEN reconstitution into *pten*<sup>-/-</sup> cells inhibits  $\alpha$ -SMA (*left panel*) and collagen I (*right panel*) gene expression. The inset blot shows a representative Western blot of *pten*<sup>-/-</sup> cells transfected with empty vector (-) or PTEN-expressing vector (PTEN). The membrane was stripped and re-probed for GAPDH as a loading control. Results are representative of 2 separate experiments.

**Figure S5.** PTEN inhibition in normal lung fibroblasts reduces EP2 expression. IMR-90 cells were untreated or were treated with the PTEN inhibitor bpV(pic) and EP2 expression was measured by quantitative PCR. Results are representative of triplicate studies. \*P=0.007.

**Figure S1.**

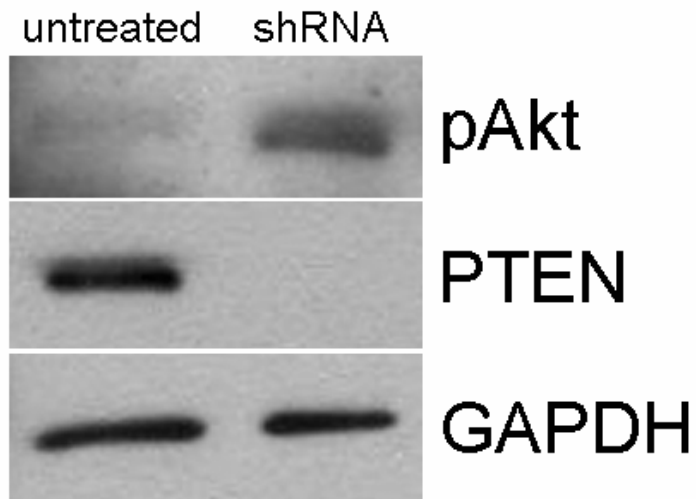

Figure S2.

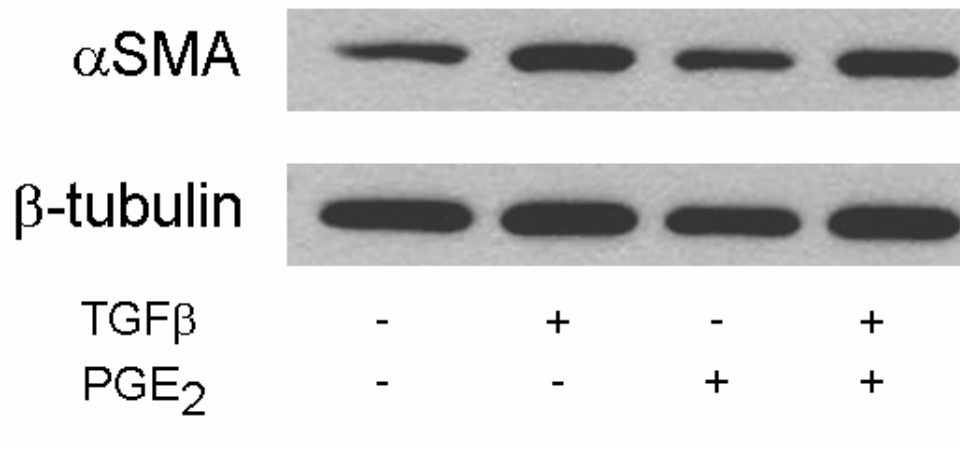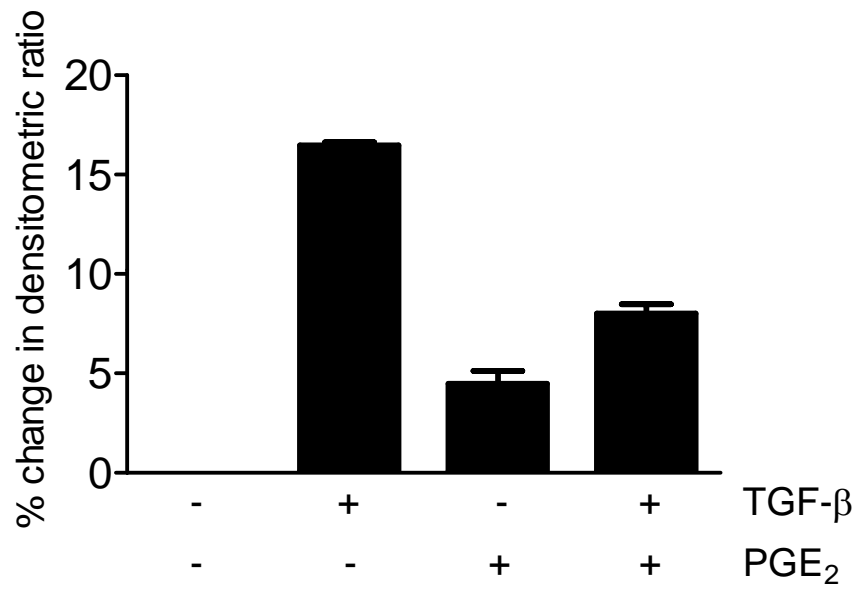

Figure S3.

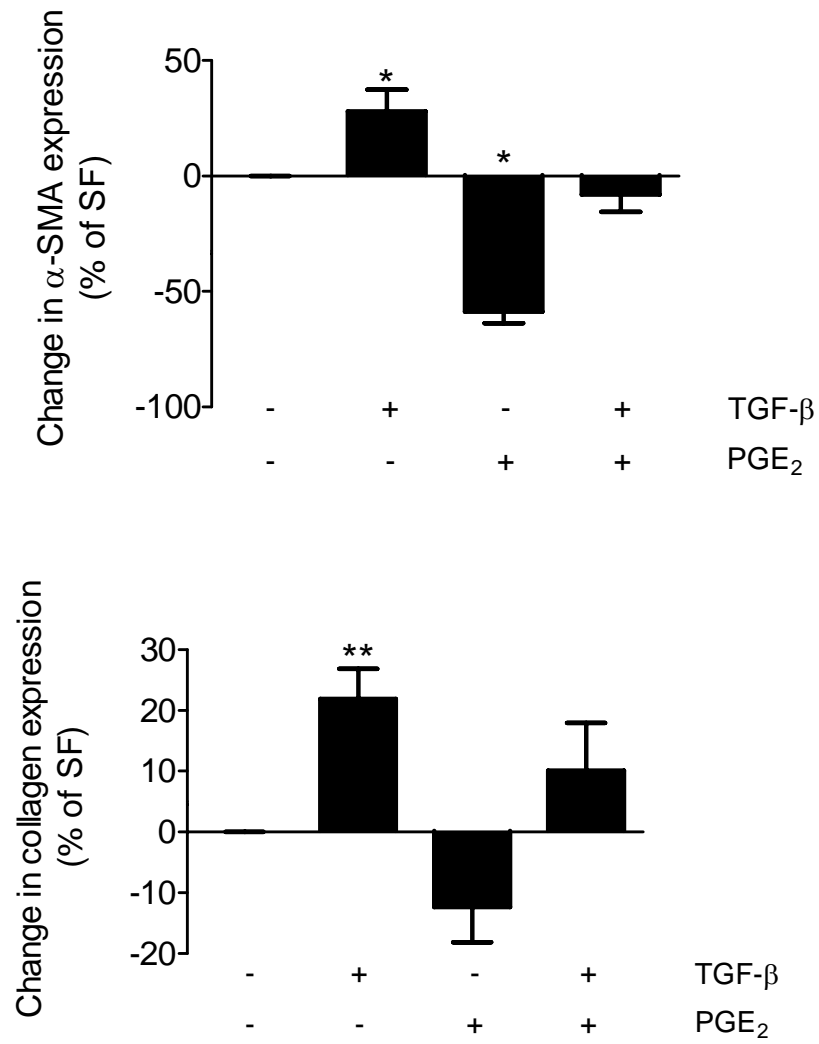

Figure S4.

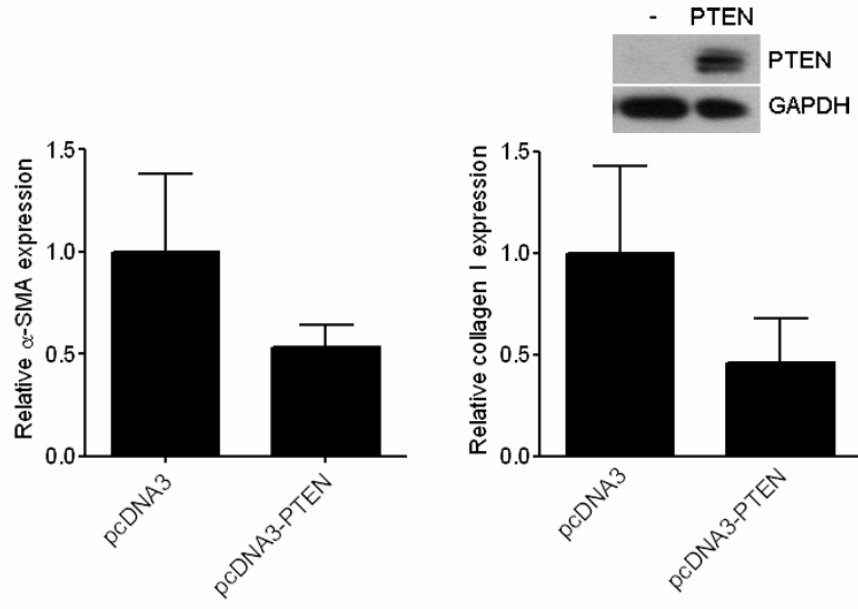

Figure S5.

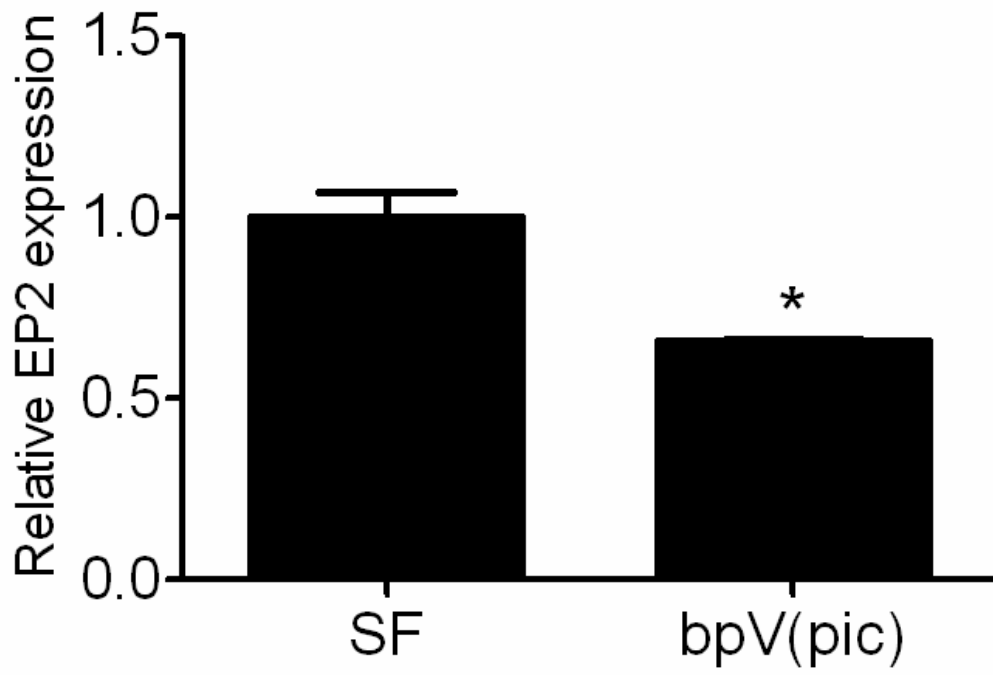

**Table S1.**

| <b>GENE</b>                    | <b>FORWARD</b>          | <b>REVERSE</b>          | <b>PROBE</b>                         |
|--------------------------------|-------------------------|-------------------------|--------------------------------------|
| <b><math>\alpha</math>-SMA</b> | TCCCTGGAGAAGAGCTACGAACT | AAGCGTTCGTTTCCAATGGT    | 6FAM-CTGACGGGCAGGTGA                 |
| <b>Collagen I</b>              | GACTGGAAGAGCGGAGAGTACTG | CAGGTCTGACCTGTCTCCATGTT | 6FAM-CTGCAACCTGGACGCCATCAAGG         |
| <b>EP1</b>                     | GTGCCAAGGGTGGTCCAA      | AACCACTGTGCCGGGAACTA    | 6FAM-CCTAACCAAGAGTGCCTGGGAAGCCA      |
| <b>EP2</b>                     | TGCGCTCAGTCCTCTGTTGT    | TGGCACTGGACTGGGTAGAAC   | 6FAM-CACTGAGAACAACAAGAAGCTCAGCAAACAT |
| <b>EP3</b>                     | TCAGATGTCGGTTGAGCAATG   | CAGGCGAACTGCAATTAGAA    | SYBR Green                           |
| <b>EP4</b>                     | ACGTCCCAGACCCTCCTGTA    | CGAACCTGGAAGCAAATTCC    | SYBR Green                           |
| <b>GAPDH</b>                   | CTGGTGCTGAGTATGTCGTG    | CAGTCTTCTGAGTGGCAGTG    | SYBR Green                           |
